# Supplementary material for: The mammalian cholesterol synthesis enzyme squalene monooxygenase is proteasomally truncated to a constitutively active form
Source: PubMed Central journal article supplement — J Biol Chem. 2021 Apr 30;296:100731. doi: 10.1016/j.jbc.2021.100731 (PMC8166775; doi:10.1016/j.jbc.2021.100731), 2021-04-30
Supplement: mmc1.pdf [file mmc1.pdf]

Supporting Information for:

**The mammalian cholesterol synthesis enzyme squalene monooxygenase is proteasomally truncated to a constitutively active form**

Hudson W. Coates and Andrew J. Brown

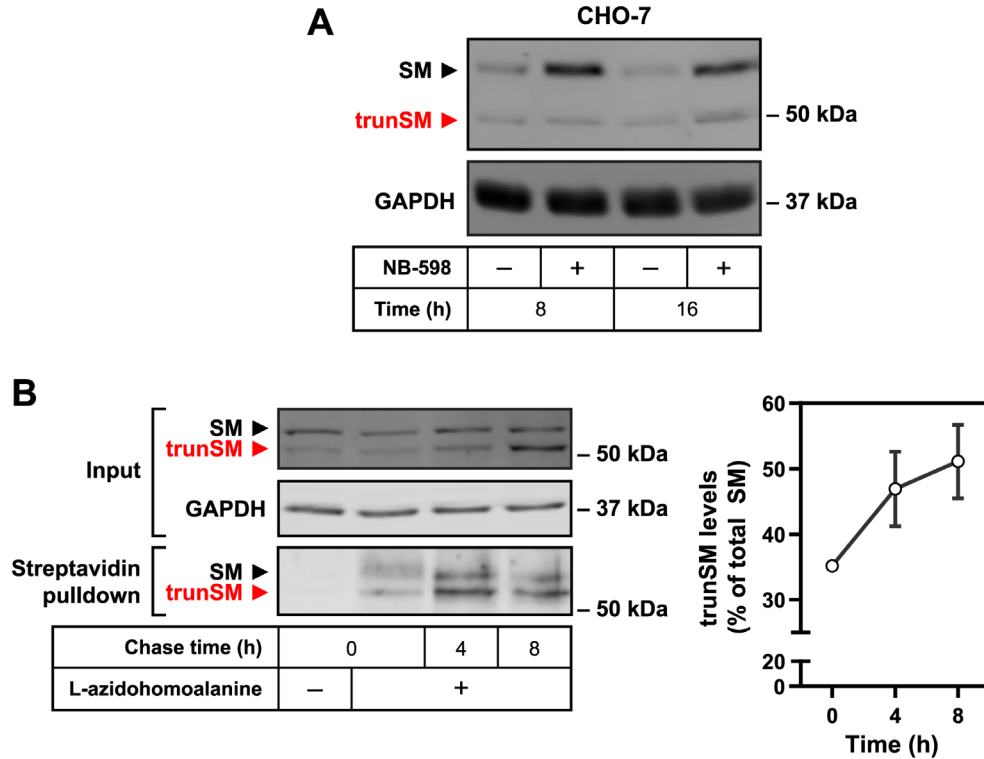

**Figure S1. Related to Fig. 1**

**(A)** CHO-7 cells express a trunSM-like protein. CHO-7 cells were treated in the presence or absence of 1  $\mu$ M NB-598 for the indicated times, and immunoblotting was performed for SM and truncated SM (trunSM, red). Immunoblot is representative of  $n = 2$  independent experiments.

**(B)** trunSM is derived from full-length SM. HEK293T cells were pre-treated in sterol-depletion medium for 16 h and starved in methionine- and sterol-depletion medium for 1 h. Newly synthesized proteins were labelled by treating cells in the presence or absence of 50  $\mu$ M L-azidohomoalanine in methionine- and sterol-depletion medium for 4 h. Cells were then incubated in maintenance medium containing 2 mM L-methionine and 1  $\mu$ M NB-598 for the indicated times. Labelled proteins were conjugated with biotin and isolated by streptavidin pull-down. Graph depicts trunSM levels as a proportion of total SM levels at each timepoint. Data presented as mean  $\pm$  half-range from  $n = 2$  independent experiments.

A

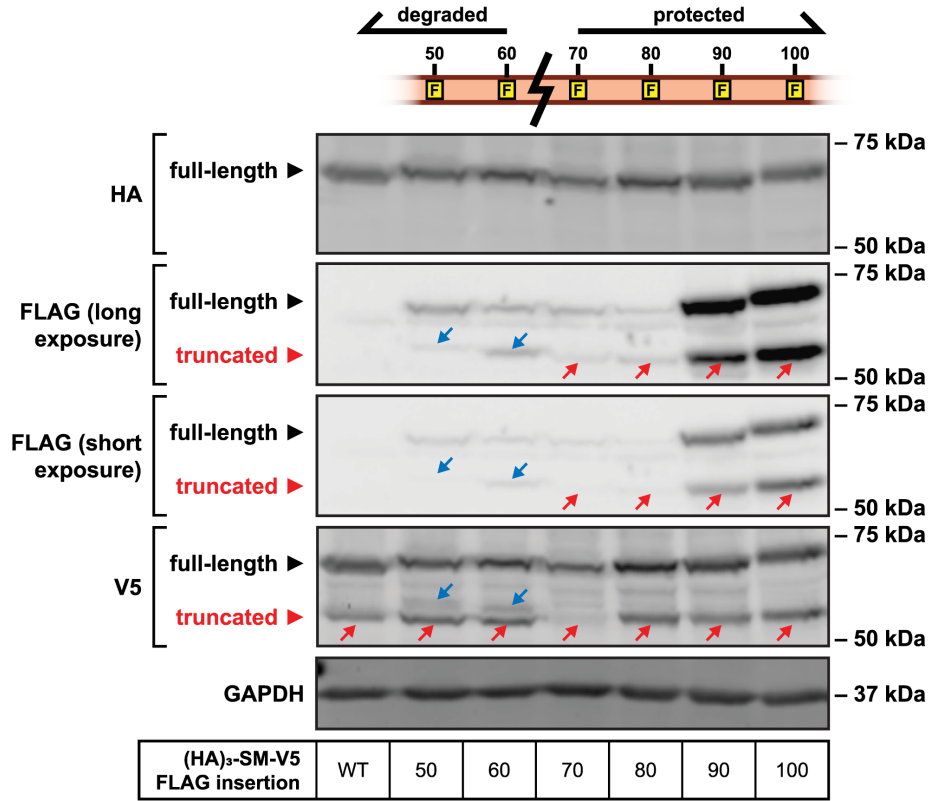

B

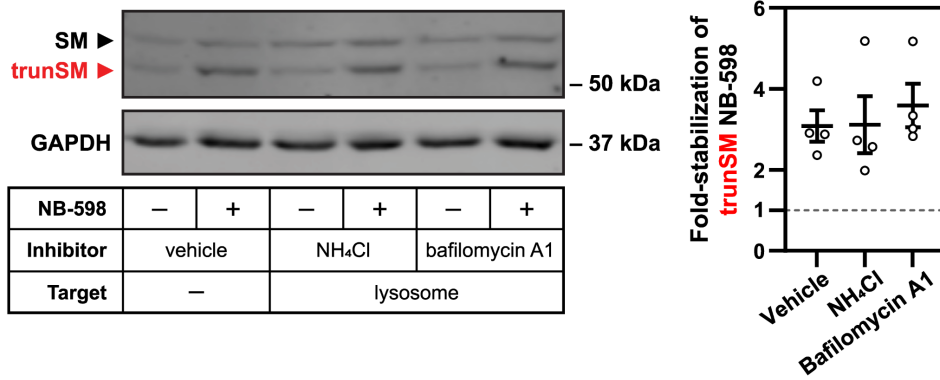

C

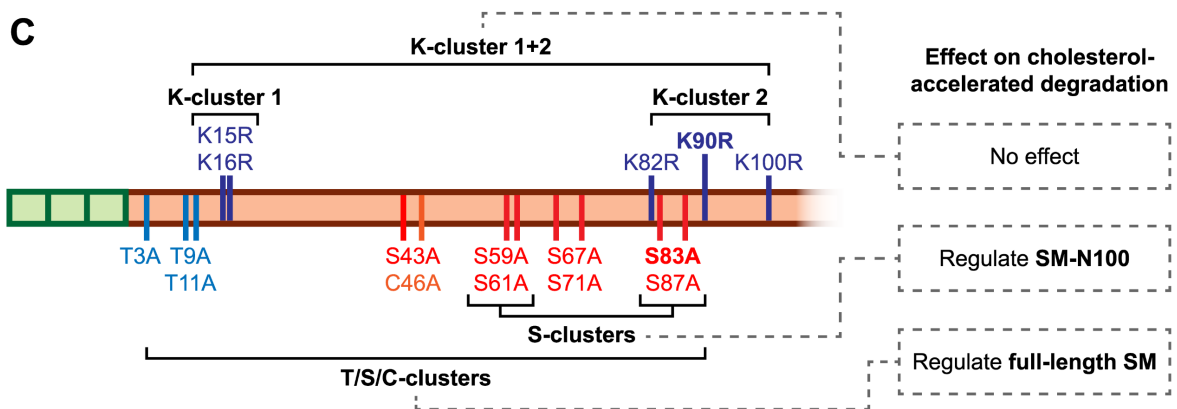

**Figure S2. Related to Fig. 3**

**(A)** The estimated SM truncation site is between residues 60 and 70. HEK293T cells were transfected with the indicated constructs for 24 h, treated with 1  $\mu$ M NB-598 for 16 h, and then treated with 20  $\mu$ M MG132 for 8 h. Immunoblot is representative of  $n \geq 2$  independent experiments. Red arrows indicate fragments corresponding to trunSM, and blue arrows indicate additional FLAG-tagged fragments that do not correspond to trunSM.

**(B)** SM truncation does not depend on the lysosome. HEK293T cells were treated with 20 mM ammonium chloride ( $\text{NH}_4\text{Cl}$ ) or 10 nM bafilomycin A1, in the presence or absence of 1  $\mu$ M NB-598, for 8 h. Graph depicts densitometric quantification of trunSM stabilization by NB-598. Data presented as mean  $\pm$  SEM from  $n = 4$  independent experiments.

**(C)** Schematic of putative ubiquitination sites within the SM-N100 domain. Lysine residues are not required for cholesterol-induced degradation of SM or SM-N100 [5, 20]. Serine residues are required for maximal cholesterol-induced degradation of SM-N100 [20], while clusters of threonine, cysteine and serine residues are required for maximal cholesterol-induced degradation of full-length SM [20]. Bolded residues indicate known ubiquitination sites [20, 27].

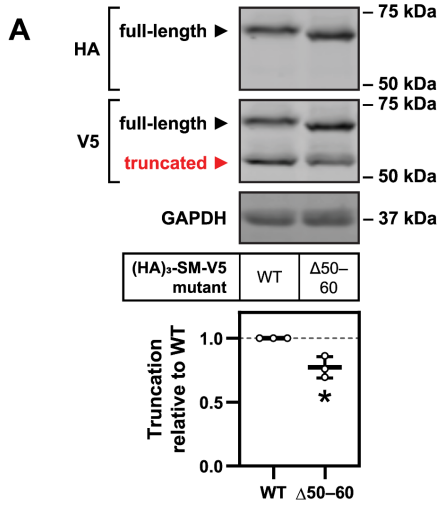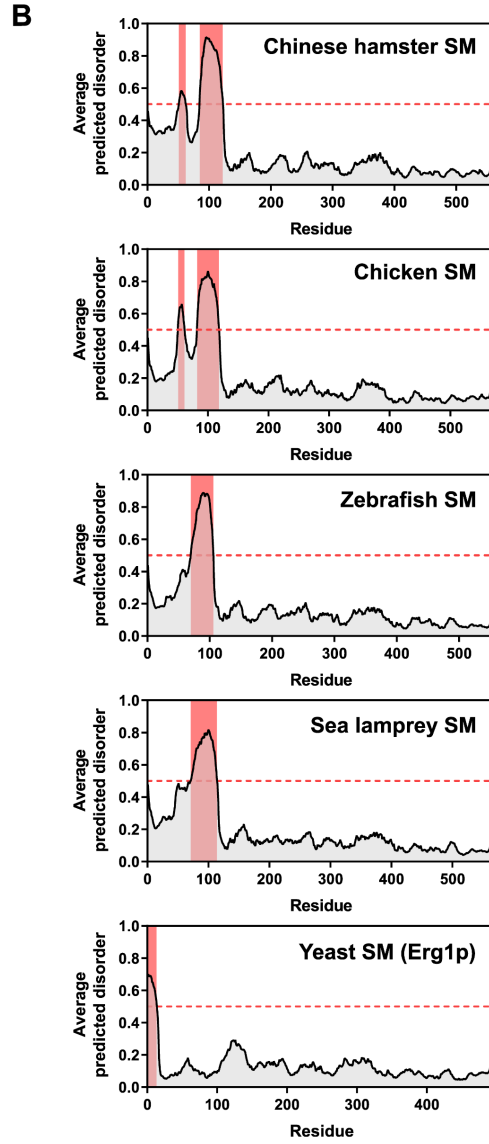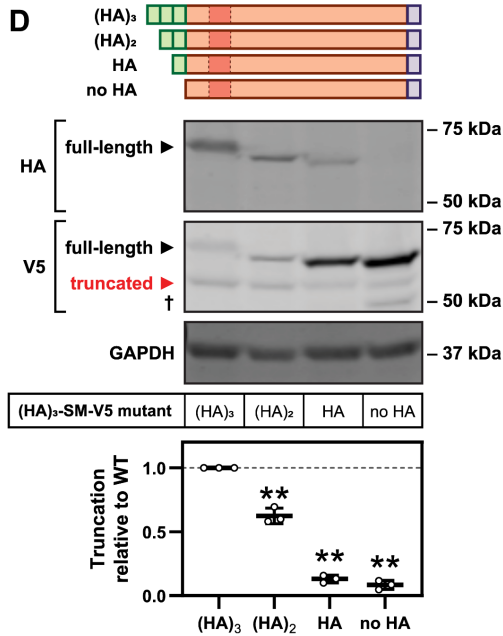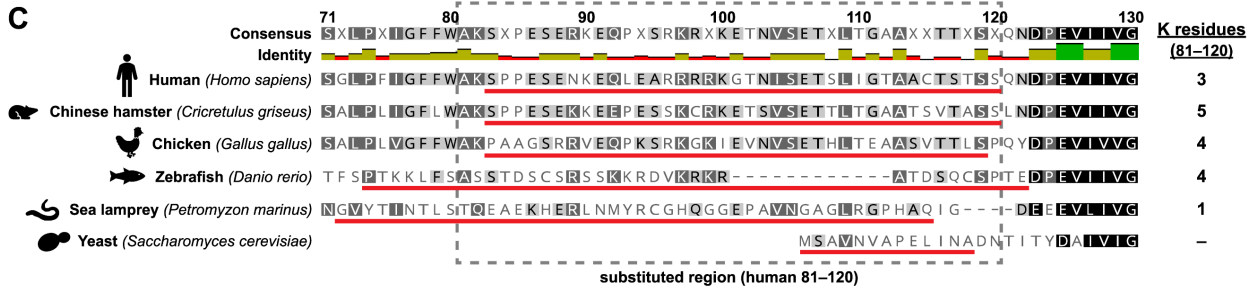

**Figure S3. Related to Fig. 4**

**(A)** A low-complexity sequence within the SM-N100 domain has a small effect on SM truncation. HEK293T cells were transfected with the indicated constructs for 24 h and refreshed in maintenance medium for 24 h. Graph depicts densitometric quantification of truncation normalized to the wild-type (WT) construct, which was set to 1 (dotted line). Data presented as mean  $\pm$  SEM from  $n = 3$  independent experiments (\*,  $p \leq 0.05$ , two-tailed paired t-test vs. WT).

**(B)** The intrinsic disorder of the SM 81–120 region is highly conserved amongst SM orthologues. Intrinsically disordered regions (red) are indicated for SM orthologues from Chinese hamster (*Cricetulus griseus*), chicken (*Gallus gallus*), zebrafish (*Danio rerio*), sea lamprey (*Petromyzon marinus*) and yeast (*Saccharomyces cerevisiae*).

**(C)** The sequence of the SM 81–120 region is poorly conserved amongst SM orthologues. Alignment of human SM residues 71–130 with SM orthologues from the indicated species. Red bars indicate regions of intrinsic disorder, and grey dashed box indicates regions that were substituted into SM constructs in Fig. 4C.

**(D)** Removal of HA tags from the SM N-terminus affects truncation. HEK293T cells were transfected with the indicated constructs for 24 h and refreshed in maintenance medium for 24 h. Graph depicts densitometric quantification of truncation normalized to the wild-type (WT) construct, which was set to 1 (dotted line). Data presented as mean  $\pm$  SEM from  $n = 3$  independent experiments (\*\*,  $p \leq 0.01$ , two-tailed paired t-test vs. WT). Dagger indicates a non-trunSM fragment.

**Table S1. Plasmids used for transfection**

| <b>Plasmid</b>                        | <b>Description</b>                                                                                                                                                                                                                                                                                          |
|---------------------------------------|-------------------------------------------------------------------------------------------------------------------------------------------------------------------------------------------------------------------------------------------------------------------------------------------------------------|
| <i>totalSQLE</i> qRT-PCR standard     | pGL3-Basic vector containing a <i>totalSQLE</i> (NM_003129.4, exon 7) qRT-PCR amplicon sequence.                                                                                                                                                                                                            |
| <i>fullSQLE</i> qRT-PCR standard      | pGL3-Basic vector containing a <i>fullSQLE</i> (NM_003129.4, exon 1) qRT-PCR amplicon sequence.                                                                                                                                                                                                             |
| <i>trunSQLE1</i> qRT-PCR standard     | pGL3-Basic vector containing a <i>trunSQLE1</i> (ENST00000523430.5, exon 1) qRT-PCR amplicon sequence.                                                                                                                                                                                                      |
| <i>trunSQLE2</i> qRT-PCR standard     | pGL3-Basic vector containing a <i>trunSQLE2</i> (XM_011517246.2, exon 1) qRT-PCR amplicon sequence.                                                                                                                                                                                                         |
| pCMV-(HA) <sub>3</sub> -SM-V5         | pcDNA3.1/V5-His TOPO vector containing the coding sequence of human SM (NM_003129.4) fused with three N-terminal HA epitope tags and C-terminal V5 and 6×His epitope tags, under the transcriptional control of a constitutive CMV promoter. Generated previously in our laboratory by Dr Julian Stevenson. |
| pCMV-(HA) <sub>3</sub> -SM-V5 FLAG50  | pCMV-(HA) <sub>3</sub> -SM-V5 containing a FLAG epitope tag insertion after SM residue 50.                                                                                                                                                                                                                  |
| pCMV-(HA) <sub>3</sub> -SM-V5 FLAG60  | pCMV-(HA) <sub>3</sub> -SM-V5 containing a FLAG epitope tag insertion after SM residue 60.                                                                                                                                                                                                                  |
| pCMV-(HA) <sub>3</sub> -SM-V5 FLAG70  | pCMV-(HA) <sub>3</sub> -SM-V5 containing a FLAG epitope tag insertion after SM residue 70.                                                                                                                                                                                                                  |
| pCMV-(HA) <sub>3</sub> -SM-V5 FLAG80  | pCMV-(HA) <sub>3</sub> -SM-V5 containing a FLAG epitope tag insertion after SM residue 80.                                                                                                                                                                                                                  |
| pCMV-(HA) <sub>3</sub> -SM-V5 FLAG90  | pCMV-(HA) <sub>3</sub> -SM-V5 containing a FLAG epitope tag insertion after SM residue 90.                                                                                                                                                                                                                  |
| pCMV-(HA) <sub>3</sub> -SM-V5 FLAG100 | pCMV-(HA) <sub>3</sub> -SM-V5 containing a FLAG epitope tag insertion after SM residue 100.                                                                                                                                                                                                                 |
| pTK-SM-V5 ΔN60                        | pcDNA3.1/V5-His TOPO vector containing the coding sequence of human SM fused with C-terminal V5 and 6×His epitope tags, under the transcriptional control of a TK promoter (pTK-SM-V5, generated previously in our laboratory [5]) and lacking the N-terminal 60 amino acids of SM.                         |
| pTK-SM-V5 ΔN65                        | pTK-SM-V5 lacking the N-terminal 65 amino acids of SM.                                                                                                                                                                                                                                                      |
| pTK-SM-V5 ΔN70                        | pTK-SM-V5 lacking the N-terminal 70 amino acids of SM.                                                                                                                                                                                                                                                      |
| pCMV-(HA) <sub>3</sub> -SM-V5 K15R    | pCMV-(HA) <sub>3</sub> -SM-V5 containing an SM K15R substitution.                                                                                                                                                                                                                                           |
| pCMV-(HA) <sub>3</sub> -SM-V5 K16R    | pCMV-(HA) <sub>3</sub> -SM-V5 containing an SM K16R substitution.                                                                                                                                                                                                                                           |
| pCMV-(HA) <sub>3</sub> -SM-V5 K82R    | pCMV-(HA) <sub>3</sub> -SM-V5 containing an SM K82R substitution.                                                                                                                                                                                                                                           |

| Plasmid                                           | Description                                                                                                                                                                |
|---------------------------------------------------|----------------------------------------------------------------------------------------------------------------------------------------------------------------------------|
| pCMV-(HA) <sub>3</sub> -SM-V5 K90R                | pCMV-(HA) <sub>3</sub> -SM-V5 containing an SM K90R substitution.                                                                                                          |
| pCMV-(HA) <sub>3</sub> -SM-V5 K100R               | pCMV-(HA) <sub>3</sub> -SM-V5 containing an SM K100R substitution.                                                                                                         |
| pCMV-(HA) <sub>3</sub> -SM-V5 K-cluster 1         | pCMV-(HA) <sub>3</sub> -SM-V5 containing SM K15R and K16R substitutions.                                                                                                   |
| pCMV-(HA) <sub>3</sub> -SM-V5 K-cluster 2         | pCMV-(HA) <sub>3</sub> -SM-V5 containing SM K82R, K90R and K100R substitutions.                                                                                            |
| pCMV-(HA) <sub>3</sub> -SM-V5 K-cluster 1/2       | pCMV-(HA) <sub>3</sub> -SM-V5 containing SM K15R, K16R, K82R, K90R and K100R substitutions.                                                                                |
| pCMV-(HA) <sub>3</sub> -SM-V5 S-clusters          | pCMV-(HA) <sub>3</sub> -SM-V5 containing SM S59A, S61A, S83A and S97A substitutions.                                                                                       |
| pCMV-(HA) <sub>3</sub> -SM-V5 T/S/C-clusters      | pCMV-(HA) <sub>3</sub> -SM-V5 containing SM T3A, T9A, T11A, S43A, C46A, S59A, S61A, S67A, S71A, S83A and S87A substitutions.                                               |
| pCMV-(HA) <sub>3</sub> -SM-V5 Δ50–60              | pCMV-(HA) <sub>3</sub> -SM-V5 containing a deletion of SM residues 50–60.                                                                                                  |
| pCMV-(HA) <sub>3</sub> -SM-V5 Δ81–120             | pCMV-(HA) <sub>3</sub> -SM-V5 containing a deletion of SM residues 81–120.                                                                                                 |
| pCMV-(HA) <sub>3</sub> -SM-V5 Δ91–110             | pCMV-(HA) <sub>3</sub> -SM-V5 containing a deletion of SM residues 91–110.                                                                                                 |
| pCMV-(HA) <sub>3</sub> -SM-V5 dup81–120           | pCMV-(HA) <sub>3</sub> -SM-V5 containing a tandem duplication of SM residues 81–120.                                                                                       |
| pCMV-(HA) <sub>3</sub> -SM-V5 (Chinese hamster)   | pCMV-(HA) <sub>3</sub> -SM-V5 containing a substitution of SM residues 81–120 with <i>Cricetulus griseus</i> SM residues 83–122.                                           |
| pCMV-(HA) <sub>3</sub> -SM-V5 (chicken)           | pCMV-(HA) <sub>3</sub> -SM-V5 containing a substitution of SM residues 81–120 with <i>Gallus gallus</i> SM residues 80–119.                                                |
| pCMV-(HA) <sub>3</sub> -SM-V5 (zebrafish)         | pCMV-(HA) <sub>3</sub> -SM-V5 containing a substitution of SM residues 81–120 with <i>Danio rerio</i> SM residues 77–104.                                                  |
| pCMV-(HA) <sub>3</sub> -SM-V5 (sea lamprey)       | pCMV-(HA) <sub>3</sub> -SM-V5 containing a substitution of SM residues 81–120 with <i>Petromyzon marinus</i> SM residues 80–116.                                           |
| pCMV-(HA) <sub>3</sub> -GAR-SM-V5                 | pCMV-(HA) <sub>3</sub> -SM-V5 containing an insertion of a glycine-alanine repeat sequence (AGAGGGAGAGGAGGAGGAGAGGAGAGGGAG) from the Epstein-Barr virus nuclear antigen-1. |
| pCMV-(HA) <sub>3</sub> -(GAR) <sub>2</sub> -SM-V5 | pCMV-(HA) <sub>3</sub> -SM-V5 containing an insertion of two glycine-alanine repeat sequences from the Epstein-Barr virus nuclear antigen-1.                               |
| pCMV-(HA) <sub>3</sub> -DHFR-SM-V5                | pCMV-(HA) <sub>3</sub> -SM-V5 containing an insertion of the coding sequence of human dihydrofolate reductase (DHFR, NM_000791.4).                                         |
| pCMV-(HA) <sub>2</sub> -SM-V5                     | pCMV-(HA) <sub>3</sub> -SM-V5 containing a deletion of one HA epitope tag.                                                                                                 |

| <b>Plasmid</b>                      | <b>Description</b>                                                                                                                                                                                                                                                                          |
|-------------------------------------|---------------------------------------------------------------------------------------------------------------------------------------------------------------------------------------------------------------------------------------------------------------------------------------------|
| pCMV-HA-SM-V5                       | pCMV-(HA) <sub>3</sub> -SM-V5 containing a deletion of two HA epitope tags.                                                                                                                                                                                                                 |
| pCMV-SM-V5                          | pcDNA3.1/V5-His TOPO vector containing the coding sequence of human SM (NM_003129.4) fused with C-terminal V5 and 6×His epitope tags, under the transcriptional control of a constitutive CMV promoter. Generated previously in our laboratory [5].                                         |
| pCMV-(HA) <sub>3</sub> -SM-V5 Y195F | pCMV-(HA) <sub>3</sub> -SM-V5 containing an SM Y195F substitution.                                                                                                                                                                                                                          |
| pCMV-(HA) <sub>3</sub> -SM-V5 Q207A | pCMV-(HA) <sub>3</sub> -SM-V5 containing an SM Q207A substitution.                                                                                                                                                                                                                          |
| pCMV-(HA) <sub>3</sub> -SM-V5 F224A | pCMV-(HA) <sub>3</sub> -SM-V5 containing an SM F224A substitution.                                                                                                                                                                                                                          |
| pCMV-(HA) <sub>3</sub> -SM-V5 D272A | pCMV-(HA) <sub>3</sub> -SM-V5 containing an SM D272A substitution.                                                                                                                                                                                                                          |
| pCMV-(HA) <sub>3</sub> -SM-V5 Y335F | pCMV-(HA) <sub>3</sub> -SM-V5 containing an SM Y335F substitution.                                                                                                                                                                                                                          |
| pCMV-(HA) <sub>3</sub> -SM-V5 Y365A | pCMV-(HA) <sub>3</sub> -SM-V5 containing an SM Y365A substitution.                                                                                                                                                                                                                          |
| pCMV-(HA) <sub>3</sub> -SM-V5 T417S | pCMV-(HA) <sub>3</sub> -SM-V5 containing an SM T417S substitution.                                                                                                                                                                                                                          |
| pTK-SM-N100-GFP-V5                  | pcDNA3.1/V5-His TOPO vector containing the coding sequence of human SM-N100 (NM_003129.4) fused with green fluorescent protein (GFP) and C-terminal V5 and 6×His epitope tags, under the transcriptional control of a constitutive TK promoter. Generated previously by our laboratory [5]. |
| pCMV-SM-V5 ΔN65                     | pCMV-SM-V5 lacking the N-terminal 65 amino acids of SM.                                                                                                                                                                                                                                     |



**Table S2. Primers used for qRT-PCR and DNA cloning**

Non-annealing nucleotides for DNA insertions, deletions and substitutions are indicated in lowercase. Abbreviations for cloning methods: OEC (overlap extension cloning) [70] PIPE (polymerase incomplete primer extension cloning) [68]; SLIC (sequence- and ligation-independent cloning) [69].

| DNA cloning primer pair                 |         | Primer sequence (5'-3')                                      | Method                                                                      |
|-----------------------------------------|---------|--------------------------------------------------------------|-----------------------------------------------------------------------------|
| <i>totalSQLE</i><br>qRT-PCR<br>standard | Forward | cattccggtactgttgtaaagccaccGCTTCCTTCCTCCTTCATCA<br>GTG        | OEC (amplified from HEK293T cDNA and used to extend the pGL3-Basic plasmid) |
|                                         | Reverse | ggccggccgccccgactctagaaGCAACAGTCATTCTCCACCA                  |                                                                             |
| <i>fullSQLE</i><br>qRT-PCR<br>standard  | Forward | cattccggtactgttgtaaagccaccCCAGTTCGCCCTCTTCTCGG               |                                                                             |
|                                         | Reverse | ggccggccgccccgactctagaaATTGGTTCCTTTTCTGCGCCTC                |                                                                             |
| <i>trunSQLE1</i><br>qRT-PCR<br>standard | Forward | cattccggtactgttgtaaagccaccCCCGCGAGGGATGCTGCG                 |                                                                             |
|                                         | Reverse | ggccggccgccccgactctagaaCTTCTGGGTCATTCTGAGAAG<br>ATG          |                                                                             |
| <i>trunSQLE2</i><br>qRT-PCR<br>standard | Forward | cattccggtactgttgtaaagccaccGGGTAAGGATTGGATTGTG<br>CC          |                                                                             |
|                                         | Reverse | ggccggccgccccgactctagaaTGGGTCATTCTGAGAAGATGT<br>TGA          |                                                                             |
| FLAG50<br>insertion                     | Forward | gactacaagacgatgacgacaagGGGGGTCTCCTCGGGC                      |                                                                             |
|                                         | Reverse | cttgctgcatcgtctttgtagtcGTTTCGGTGGCGACAGC                     |                                                                             |
| FLAG60<br>insertion                     | Forward | gactacaagacgatgacgacaagTCCCAGTTCGCCCTCTTCTCG                 |                                                                             |
|                                         | Reverse | cttgctgcatcgtctttgtagtcGCCGCTCTGCTGGCGCC                     |                                                                             |
| FLAG70<br>insertion                     | Forward | gactacaagacgatgacgacaagTCAGGCCTGCCTTTCATTGGC                 |                                                                             |
|                                         | Reverse | cttgctgcatcgtctttgtagtcGAGAATATCCGAGAAGAGGGCG<br>AAC         |                                                                             |
| FLAG80<br>insertion                     | Forward | gactacaagacgatgacgacaagGCCAAATCCCCCCTGAATC                   | PIPE                                                                        |
|                                         | Reverse | cttgctgcatcgtctttgtagtcCCAGAAGAAGCCAATGAAAGGC                |                                                                             |
| FLAG90<br>insertion                     | Forward | gactacaagacgatgacgacaagGAGCAGCTCGAGGCCAGGAG                  |                                                                             |
|                                         | Reverse | cttgctgcatcgtctttgtagtcCTTATTTTCTGATTACAGGGGGG<br>ATTTG      |                                                                             |
| FLAG100<br>insertion                    | Forward | gactacaagacgatgacgacaagGGAACCAATATTTTCAGAAAC<br>AAGCTTAATAGG |                                                                             |
|                                         | Reverse | cttgctgcatcgtctttgtagtcTTTTCTGCGCCTCCTGGCC                   |                                                                             |
| ΔN60                                    | Forward | ggaattgcccttatgTCCCAGTTCGCCCTCTTCTCG                         | PIPE                                                                        |
|                                         | Reverse | AAGGGCAATTCCACCACACTGGACTAGTGGATC                            |                                                                             |
| ΔN65                                    | Forward | ggaattgcccttatgTTCTCGGATATTCTCTCAGGCCTGC                     |                                                                             |
|                                         | Reverse | AAGGGCAATTCCACCACACTGGACTAGTGGATC                            |                                                                             |
| ΔN70                                    | Forward | ggaattgcccttatgTCAGGCCTGCCTTTCATTGGC                         |                                                                             |
|                                         | Reverse | AAGGGCAATTCCACCACACTGGACTAGTGGATC                            |                                                                             |
| BGHR2                                   | Reverse | GCGATGCAATTTCTCATT                                           | OEC (generic reverse primer for point mutations)                            |
| K15R                                    | Forward | GCCACTTTCACCTATTTTTATAgGAAGTTCGGGGACT<br>TCATCAC             | OEC (with BGHR2 reverse)                                                    |

| DNA cloning primer pair                        |                                                                              | Primer sequence (5'–3')                                                                                                                                 | Method                                                                                                                                 |
|------------------------------------------------|------------------------------------------------------------------------------|---------------------------------------------------------------------------------------------------------------------------------------------------------|----------------------------------------------------------------------------------------------------------------------------------------|
| K16R                                           | Forward                                                                      | GCCACTTTCACCTATTTTTATAAGAgGTTTCGGGGACT<br>TCATCAC                                                                                                       | OEC (with<br>BGHR2 reverse)                                                                                                            |
| K82R                                           | Forward                                                                      | GGCTTCTTCTGGGCCAggTCCCCCCTGAATCAG                                                                                                                       |                                                                                                                                        |
| K90R                                           | Forward                                                                      | CAGAAAATAgGGAGCAGCTC                                                                                                                                    |                                                                                                                                        |
| K100R                                          | Forward                                                                      | CCAGGAGGCGCAGAAAggGGAACCAATATTTTCAGAAA<br>CAAG                                                                                                          |                                                                                                                                        |
| K15R / K16R                                    |                                                                              |                                                                                                                                                         |                                                                                                                                        |
| K82R / K90R<br>/ K100R                         |                                                                              |                                                                                                                                                         |                                                                                                                                        |
| K15R / K16R<br>/ K82R /<br>K90R / K100R        |                                                                              | Forward     Appropriate mutagenic primer/s                                                                                                              |                                                                                                                                        |
| S-clusters                                     |                                                                              | <u>Vector:</u><br>Forward     GGAACCAATATTTTCAGAAACAAGCTTAATAG<br>Reverse     AGCGTAATCTGGAACGTCATATG                                                   |                                                                                                                                        |
| T/S/C-clusters                                 |                                                                              | <u>Insert:</u><br>Forward     gttccagattacgctTGGACTTTTTCTGGGCATTGCC<br>Reverse     TGAAATATTGGTTCTTTTTCTGCGC                                            |                                                                                                                                        |
| Δ50–60                                         | Forward<br>Reverse                                                           | TACCGCTGTCGCCACCGATCCCAGTTCGCCCTCTTCT<br>CG<br>TCGGTGGCGACAGCGGTAGGAGAGCAC                                                                              |                                                                                                                                        |
| Δ81–120                                        | Forward<br>Reverse                                                           | attggcttctctggCAGAATGACCCAGAAGTTATCATCG<br>ttctgggtcattctgCCAGAAGAAGCCAATGAAAGGCAG                                                                      | PIPE                                                                                                                                   |
| Δ91–110                                        | Forward<br>Reverse                                                           | gaatcagaaaaaagGGAACAGCTGCCTGTACATCAAC<br>acaggcagctgttcCCTTATTTTCTGATTACAGGGGG                                                                          |                                                                                                                                        |
| dup81–120                                      | <u>Vector:</u><br>Forward<br>Reverse<br><u>Insert:</u><br>Forward<br>Reverse | AAATCCCCCCTGAATCAGAAAATAAGGAG<br>GGCCCAGAAGAAGCCAATGAAAGG<br>ggcttctctgggccAAATCCC<br>ttcaggggggatttCTGAGAAGATGTTGATGTACAGGCAGC                         | SLIC<br>(insert amplified<br>from pCMV-<br>HA <sub>3</sub> -SM-V5)                                                                     |
| 81–120<br>substitution<br>(Chinese<br>hamster) | Forward<br>Reverse                                                           | cctgccttcattggcttctctggGCCAAGTCACCCCTGAG<br>cacgatgataactctgggtcattctgAGAAGATGCTGTTACTGAGG<br>TAGC                                                      | OEC (amplified<br>from SM-N100-<br>GFP-V5<br>plasmids<br>generated in [17]<br>and used to<br>extend the<br>pCMV-HA3-<br>SM-V5 plasmid) |
| 81–120<br>(chicken)                            | Forward<br>Reverse                                                           | cctgccttcattggcttctctggGCCAAGCCCGCCGC<br>cacgatgataactctgggtcattctgaggagacaatgtcgttacagaagccgctcag<br>tgagggtgggttcggacacgttcacCTCGATCTTGCCCTTCCTG<br>C |                                                                                                                                        |
| 81–120<br>substitution<br>(zebrafish)          | Forward<br>Reverse                                                           | cctgccttcattggcttctctggGCCTCTAGCACCGATAGCTG<br>cacgatgataactctgggtcattctgtgggtacattgGGAATCTGTGGCT<br>CTCTTCCG                                           |                                                                                                                                        |
| 81–120<br>substitution<br>(sea lamprey)        | Forward<br>Reverse                                                           | cctgccttcattggcttctctggACCCAGGAAGCAGAAAAACAC<br>G<br>cacgatgataactctgggtcattctgaccaattgggctgaggccccggaggccc<br>gcaccattgacggccgCTCTCCCCCTGGTGC          |                                                                                                                                        |

| DNA cloning primer pair                           | Primer sequence (5'–3')              | Method                                                                                                                               |                                                                                        |
|---------------------------------------------------|--------------------------------------|--------------------------------------------------------------------------------------------------------------------------------------|----------------------------------------------------------------------------------------|
| pCMV-(HA) <sub>3</sub> -GAR-SM-V5                 | <u>Vector:</u><br>Forward<br>Reverse | TGGACTTTTCTGGGCATTGCC<br>AGCGTAATCTGGAACGTCATATG                                                                                     | SLIC ('GAR generation' primers extended and used as template for insert amplification) |
|                                                   | <u>GAr generation:</u><br>Forward    | GCTGGAGCAGGCGGTGGAGCAGGTGCTGGAGGTGC<br>AGGTGGAGCAGGCGGTGCAGGAGCA<br>ACCTGCTCCACCTCCAGCACCTGCACCACCTGCTCC<br>TGCACCGCCTGCTCCACCTGCACC |                                                                                        |
| pCMV-(HA) <sub>3</sub> -(GAR) <sub>2</sub> -SM-V5 | Reverse                              | tccatgatgagctccagattacgctGCTGGAGCAGGCGGTGGAGC<br>gaaagtggcaatgccagaaaagtccaACCTGCTCCACCTCCAGCA                                       |                                                                                        |
|                                                   | <u>Insert:</u><br>Forward<br>Reverse |                                                                                                                                      |                                                                                        |
| pCMV-(HA) <sub>3</sub> -DHFR-SM-V5                | <u>Vector:</u><br>Forward<br>Reverse | TGGACTTTTCTGGGCATTGCC<br>AGCGTAATCTGGAACGTCATATG                                                                                     | PIPE (insert amplified from HEK293T cDNA)                                              |
|                                                   | <u>Insert:</u><br>Forward<br>Reverse | gtccagattacgctGTTGGTTCGCTAAACTGCATCG<br>gcccagaaaagtccAATCATTCTTCTCATATACTTCAAATTT<br>GTAC                                           |                                                                                        |
| ΔHA                                               | Forward<br>Reverse                   | cctgactatgctgggCTATCCATATGACGTTCCAGATTAC<br>aacgtcatatggataGCCCGCATAGTCAGGAACAT                                                      | PIPE                                                                                   |
| Δ(HA) <sub>2</sub>                                | Forward<br>Reverse                   | ggaattgcccttatgTATCCATATGACGTTCCAGATTAC<br>aacgtcatatggataCATAAGGGCAATTCCACCACA                                                      | PIPE                                                                                   |
| Q168A                                             | Forward                              | GTTGGAGAATTCTGgccCCGGGTGGTTATC                                                                                                       | OEC (with BGHR2 reverse)                                                               |
| Y195A                                             | Forward                              | CCAGGTTGTAAATGGTgcCATGATTCATGATCAGG                                                                                                  |                                                                                        |
| Y195F                                             | Forward                              | CCAGGTTGTAAATGGTtCATGATTCATGATCAGG                                                                                                   |                                                                                        |
| Q207A                                             | Forward                              | AAAGCAAATCAGAGGTTgccATTCCCTTACCCTCTGTC                                                                                               |                                                                                        |
| F224A                                             | Forward                              | CAGAGTGGAAGAGCTgcCCATCACGGAAGATTC                                                                                                    |                                                                                        |
| D272A                                             | Forward                              | GGATAAAGAGACTGGAGGccATCAAGGAACTCCATGC                                                                                                |                                                                                        |
| Y335F                                             | Forward                              | GTCCAGTTCTCATCTtCCAGATTTTCATCCAG                                                                                                     |                                                                                        |
| Y365A                                             | Forward                              | GAATACATGGTTGAAAAAATTgcCCCACAAATACCT<br>GATC                                                                                         |                                                                                        |
| T417S                                             | Forward                              | AATATGAGGCATCCACTTtCTGGTGGAGGAATGACT<br>G                                                                                            |                                                                                        |

**Table S3. siRNA used for transfection**

| <b>siRNA</b>                     | <b>Description</b>                                                                 |
|----------------------------------|------------------------------------------------------------------------------------|
| SIC001                           | MISSION® universal negative control #1                                             |
| SASI_Hs01_00149248               | Targets human <i>SQLE</i> exon 9 (NM_003129)                                       |
| SASI_Hs01_00149256               | Targets human <i>SQLE</i> exon 1 (NM_003129)                                       |
| SASI_Hs01_00095058               | Targets human <i>UBE2J2</i> (NM_058167)                                            |
| SASI_Hs01_00105239               | Targets human <i>MARCHF6</i> (NM_005885)                                           |
| SASI_Hs01_00118726               | Targets human <i>VCP</i> (NM_007126)                                               |
| CGGCUUUGGCGAC-GGUUCUdTdT (sense) | Targets Chinese hamster ( <i>Cricetulus griseus</i> ) <i>Sqle</i> (XM_003515960.5) |

**Table S4. Primers used for qRT-PCR**

All primer pairs were designed during this study.

| qRT-PCR primer pair |         | Primer sequence (5'–3')  |
|---------------------|---------|--------------------------|
| <i>PBGD</i>         | Forward | AGGTTGCCATCCTCAGTCGTC    |
|                     | Reverse | TTGCCACCACACTGTCCGTC     |
| <i>totalSQLE</i>    | Forward | GCTTCCTTCCTCCTTCATCAGTG  |
|                     | Reverse | GCAACAGTCATTCTCCACCA     |
| <i>fullSQLE</i>     | Forward | CCAGTTCGCCCTCTTCTCGG     |
|                     | Reverse | ATTGGTTCCTTTTCTGCGCCTC   |
| <i>trunSQLE1</i>    | Forward | CCCGCGAGGGATGCTGCG       |
|                     | Reverse | CTTCTGGGTCATTCTGAGAAGATG |
| <i>trunSQLE2</i>    | Forward | GGGTAAGGATTGGATTTGTGCC   |
|                     | Reverse | TGGGTCATTCTGAGAAGATGTTGA |
